# Supplementary material
Source: PubMed Central journal article supplement (PMC3376261)
Supplement: ejhg2011271x1.pdf [file ejhg2011271x1.pdf]

## **Hamdan et al.,**

Identification of a novel in-frame *de novo* mutation in *SPTANI* in intellectual disability and pontocerebellar atrophy

### **Supplementary Information**

#### **Gene screening and bioinformatics**

PCR primers targeting all coding exons and intronic splice junctions of *SPTANI* (longest isoform NM\_001130438.2) were designed using Exon-Primer from the UCSC Genome Browser (Table S1). PCR was done in 384 well plates using 5 ng of genomic DNA, according to standard procedures. The PCR products were sequenced at the McGill University and Genome Quebec Innovation Centre (Montreal, Canada) ([www.genomequebecplatforms.com/mcgill/](http://www.genomequebecplatforms.com/mcgill/)) on a 3730XL DNA Analyzer. In each case, rare mutations (identified only once in the disease cohort) were confirmed by re-amplifying the fragment and re-sequencing of the proband and both parents using reverse and forward primers. PolyPHRED (v.5.04), PolySCAN (v.3.0) and Mutation Surveyor (v.3.10 Soft Genetics Inc.) were used for mutation detection.

#### **Cell culture, transfection, and immunofluorescence**

Mouse neuroblastoma 2A (N2A) cells were grown as previously described.<sup>1</sup> N2A cells on 200 µg/ml poly-D-lysine (Millipore)/20 µg/ml laminin (Invitrogen)-coated glass coverslips (in 24 well plates) were transfected with 200 ng of plasmid DNA using FuGene6 reagent (Roche diagnostics, Tokyo, Japan). After 4 hrs, culture medium was changed to low serum medium (5% FBS) with 20 µM all-trans-retinoic acid (Sigma) in order to induce neural differentiation, and cells were subsequently cultured for 24 hours. Primary neuronal culture and transfection were also performed as previously described.<sup>2</sup>

N2A cells and primary neurons were fixed with 2% paraformaldehyde in PBS for 20 min, and permeabilized with 0.25% and 0.1% Triton X-100 for 5 min, respectively. Cells were then blocked with 10% normal goat serum for 30 min. The following primary antibodies were used: mouse anti-Flag M2 (1:1000 dilution; Sigma), rabbit anti-β-II spectrin (1:400 dilution; Abcam), rabbit anti-β-III spectrin (1:400 dilution; Abcam). Alexa Fluor 488- and 546-conjugated secondary antibodies to rat and mouse primary antibodies (Invitrogen) were used. Photographs were taken as previously described<sup>2</sup>. For evaluation of spectrin aggregation in N2A cells and primary neurons at 7 days in vitro with anti-Flag antibody, more than 50 and 100 isolated transfected neurons were analyzed in each experiment,

respectively, and representative cells were photographed. The results were confirmed in three independent experiments. Non-repeated measures using ANOVA followed by a Bonferroni post-test was applied for examination of statistical significance ( $P < 0.01$ ).

### **Clinical description of patients with *de novo* mutations in *SPTANI***

*Patient-1.* Patient 1 is a 9 year-old boy born to non-consanguineous French Canadian parents. Family history is positive since the patient also has a sister with mild ID. Perinatal history is unremarkable. Cognitive and adaptive assessments performed at 6 years and 6 months of age with the Wechsler Intelligence Scale for Children-III and the Vineland Adaptive Behavioural Scale were consistent with mild intellectual disability. The patient also shows attention deficit with impulsivity. At 9 years of age, height is 130.1 cm (75th centile), weight is 26.5 kg (75-90th centile) and head circumference is 55.5 cm (97th centile). On physical examination, no specific dysmorphic features were noticed. Neurological examination was unremarkable. Karyotyping (at a resolution of 750 bands), subtelomeric FISH studies and molecular testing for the triple repeat expansion associated with the Fragile X syndrome did not show any abnormality. Brain CT scan performed at 5 years and 6 months of age was normal.

*Patient-2.* Patient-2 is a 11 year-old boy born to non-consanguineous French Canadian parents. Family history is negative. He was delivered at term after an unremarkable pregnancy. APGAR score was 9<sup>1</sup>, 10<sup>5</sup> and 10<sup>10</sup>. At birth, his weight was 3.3 kg (50<sup>th</sup> percentile). Hypotonia was noted over the first few months of life. At 16 months of age, he showed a few febrile seizures suggestive of flexion spasms over a few days. EEG was normal. At 2 years of age, he showed non-febrile generalized tonic-clonic and absence seizures. EEG was again normal. Valproic acid administration was then initiated. He had a few seizures over the next 3 years and none since 5 years of age. Valproic acid administration was stopped at 7 years of age.

Development was characterized by global delay. At 11 years of age, the patient can stay sit and can drive a wheel chair but cannot walk. He does not say words but he understands a few commands and communicate using a few signs. He can eat with a fork and has acquired the pincer grasp. He can operate a TV and a DVD player. Height is 155 cm (90-97th centile), weight is 52 kg (90-97th centile) and head circumference is 56 cm (90-97th centile). On physical examination, no specific dysmorphic features were noticed. Neurological examination revealed severe axial and mild appendicular hypotonia. Karyotyping (at a resolution of 540 bands), subtelomeric FISH studies and molecular testing for the triple repeat expansion associated with the Fragile X syndrome did not show any

abnormality. Blood lactate and ammonia levels were 1.66 mmol/L (reference values: 0,50 -2,20 mmol/L) and 37  $\mu$ mol/L (reference values: 0-55  $\mu$ mol/L), respectively. Plasma amino-acid and urine organic acid chromatography were unremarkable. Nerve conduction velocity and electromyogram studies were normal. Brain MRI studies were performed at 17 months and at 3 years and 5 months (Figure 3) of age. Both studies showed severe atrophy of the cerebellum and brainstem without any other abnormality.

**References**

1. Saitsu H, Kato M, Mizuguchi T *et al*: De novo mutations in the gene encoding STXBP1 (MUNC18-1) cause early infantile epileptic encephalopathy. *Nat Genet* 2008; 40: 782-788.
2. Saitsu H, Tohyama J, Kumada T *et al*: Dominant-negative mutations in alpha-II spectrin cause West syndrome with severe cerebral hypomyelination, spastic quadriplegia, and developmental delay. *Am J Hum Genet* 2010; 86: 881-891.

**Table S1.** Paternity/maternity testing for patients 1 and 2 done using 6 informative polymorphic unlinked microsatellite markers.

| <b>Family-1</b>  | <b>D3S1754</b> |   | <b>D4S3351</b> |   | <b>D8S1179</b> |   | <b>D15S659</b> |   | <b>D14S587</b> |   | <b>D19S215</b> |    |
|------------------|----------------|---|----------------|---|----------------|---|----------------|---|----------------|---|----------------|----|
| Patient-1        | 7              | 8 | 4              | 6 | 6              | 7 | 7              | 8 | 2              | 2 | 8              | 6  |
| Father           | 7              | 8 | 6              | 6 | 6              | 8 | 6              | 7 | 2              | 7 | 5              | 8  |
| Mother           | 8              | 8 | 4              | 5 | 6              | 7 | 7              | 8 | 2              | 6 | 6              | 7  |
| Affected Sister  | 8              | 8 | 4              | 6 | 6              | 8 | 6              | 8 | 2              | 7 | 5              | 7  |
| <b>Family -2</b> |                |   |                |   |                |   |                |   |                |   |                |    |
| Patient-2        | 7              | 7 | 5              | 9 | 6              | 8 | 6              | 6 | 3              | 5 | 2              | 6  |
| Father           | 7              | 8 | 5              | 9 | 6              | 8 | 2              | 6 | 2              | 3 | 2              | 6  |
| Mother           | 7              | 7 | 5              | 6 | 5              | 6 | 2              | 6 | 10             | 5 | 6              | 12 |

Shown here are the segregation profiles of microsatellite markers tested in both families.

**Table S2.** Primers used to amplify *SPTANI* (NM\_001130438.2) coding exons and intronic junctions.

| primer  | forward seq               | reverse seq                 | amplicon size (bp) | exons | Chr | start (hg18) | Stop (hg18) |
|---------|---------------------------|-----------------------------|--------------------|-------|-----|--------------|-------------|
| G265_1  | TCAATTCATTGTCTCCTGGG      | GGTCATAATTAAGTAACTTTCCTCGTC | 451                | 2     | 9   | 130368719    | 130369169   |
| G265_2  | TAAGAGAATGGGCAAGGTGC      | GCTGTCATATTACAAAGGCAGG      | 439                | 3     | 9   | 130370729    | 130371167   |
| G265_3  | TTGTCTAAACTCTATGAAGAGCC   | TGTGCTAACTGGGTCTCAC         | 311                | 4     | 9   | 130376697    | 130377007   |
| G265_4  | TGTTTGATGTTTCTGGAAGCC     | AGAAATTAGGGGACCAATCATC      | 317                | 5     | 9   | 130377225    | 130377541   |
| G265_5  | GATGCTCAAGGAACCAACC       | TTGACCTAGAAATGAACTCCGTC     | 620                | 6-7   | 9   | 130378837    | 130379456   |
| G265_6  | AGGTGGGTTTTACAAGCAGC      | CAGAACAGACCCTTAACTCTGC      | 319                | 8     | 9   | 130379372    | 130379690   |
| G265_7  | GCTTTAGGGAGGCCATTTTC      | GCCTCACCAACTGATAAAC         | 284                | 9     | 9   | 130380139    | 130380422   |
| G265_8  | TGCTTAGTAAATTCAGCACC      | AAGGATGAATAATAGCTTTCAGAGAC  | 260                | 10    | 9   | 130381656    | 130381915   |
| G265_9  | TAGCTGTTCTGTGCCTCG        | AAAACAAAACAAGCACACTACCC     | 294                | 11    | 9   | 130382950    | 130383243   |
| G265_10 | GCCAAATACCTTTGCTTC        | CTGTTTGGAACTCTCCAGG         | 272                | 12    | 9   | 130383801    | 130384072   |
| G265_11 | GCAGTTACTTTTCCAGAGGC      | TCCCTTATTCGTCCTTAGC         | 539                | 13-14 | 9   | 130384504    | 130385042   |
| G265_12 | AAGTATGAAGGTAGTGAAGGG     | TGTCCTAAAATACTTAATAGAAAGGG  | 358                | 15    | 9   | 130385102    | 130385459   |
| G265_13 | ACTGTTTATGGGCAGTGTTG      | TTACTGGCTTTTCTCCCTC         | 323                | 16    | 9   | 130385817    | 130386139   |
| G265_14 | CTTTCTAGGAGCCCCAGATG      | ATTTAAATTCGACCTGCC          | 483                | 17    | 9   | 130386242    | 130386724   |
| G265_15 | CTGGAACCATGGTGGTAGC       | ATGCCCTCGCAAGAAG            | 280                | 18    | 9   | 130386732    | 130387011   |
| G265_16 | AGTGCCGTGAACACACAGAG      | ACTGTAATGCACACCTCCCG        | 416                | 19    | 9   | 130387756    | 130388171   |
| G265_17 | GAGAAAGGCTGTTGAGGCAG      | GGAACACCTGCTGACAGTATC       | 263                | 20    | 9   | 130389608    | 130389870   |
| G265_18 | TCTTGGATCAGATTTTATTGGTAGC | AACCCACAGAAACCAACTG         | 368                | 21    | 9   | 130390752    | 130391119   |
| G265_19 | TTAAAACAACGCTCTCGTGTG     | CTTCGGCCCATGTGGAAC          | 318                | 22    | 9   | 130393478    | 130393795   |
| G265_20 | GAGCTGCTGCCTTTCATCC       | TGGACAAAGGCCTCAAGAG         | 224                | 23    | 9   | 130395009    | 130395232   |
| G265_21 | AGCCTGGAATCCACATCTTG      | CCAGCTTGGATGACAGTGAG        | 412                | 24    | 9   | 130396169    | 130396580   |
| G265_22 | GCCATAGTTTGTGACTATGTCTCC  | GAAACACTGCTTGTGGGC          | 275                | 25    | 9   | 130400422    | 130400696   |
| G265_23 | TCCTGTGTTTCCAGGTTTGG      | TGGCTTGATATTCTCCCAAG        | 185                | 26    | 9   | 130400973    | 130401157   |
| G265_24 | AGAGTCATTTCGCTGGAAAGG     | AGAAAGGCACACCAGAAAAG        | 195                | 27    | 9   | 130402100    | 130402294   |
| G265_25 | TCAATGACACTTGACGCTCAG     | TGCTGTAGACAGGGAAGGAAG       | 196                | 28    | 9   | 130405566    | 130405761   |
| G265_26 | TTTTCCAAAGTCTGACTGG       | TCTAGGATCTCAGTCAGCAAGC      | 253                | 29    | 9   | 130406354    | 130406606   |
| G265_27 | TGCTCTGTAATCAAGGCAGTTG    | TTTTACAATAAAAATGACCCC       | 577                | 30-31 | 9   | 130407073    | 130407649   |
| G265_28 | CCCAAGATAACTTTCTGAGGC     | AGTAAAGAGGGCAAGAGGC         | 637                | 32-33 | 9   | 130409595    | 130410231   |
| G265_29 | TGCTCTGGTTTCTGACC         | GGTATTCTTGGAGATATAACAGTG    | 317                | 34    | 9   | 130410157    | 130410473   |
| G265_30 | CCTGCCACCAGCTAGTTCTC      | CATGGGTGCAAGGAGATTG         | 627                | 35-36 | 9   | 130410858    | 130411484   |
| G265_31 | GTTCCCAAATGCTGAGCTTC      | GAAGAGACACCAGCAAACCG        | 242                | 37    | 9   | 130411634    | 130411875   |
| G265_32 | GTTGGCATTACCCAGTTC        | CATCTGTAATTCAGCCTAAAGTCTTC  | 385                | 38    | 9   | 130413693    | 130414077   |
| G265_33 | TCAAATTGAGCTTTAGGAGAGG    | ACTGATGGACCCACTGTGC         | 280                | 39    | 9   | 130414137    | 130414416   |
| G265_34 | CTGGGCAACCTGAATTTTCC      | CACTCTTTTTCTCAAACACGC       | 273                | 40    | 9   | 130415405    | 130415677   |
| G265_35 | CAACACTCCACATCTCAGTAAGG   | AGTCAGCCTGTGGTTCTCG         | 379                | 41    | 9   | 130417633    | 130418011   |
| G265_36 | AGTTGACTGATGTCCCCAC       | CCACAGCTCAGAGTCTGCC         | 616                | 42-43 | 9   | 130419666    | 130420281   |
| G265_37 | ATGCCAGCTTTTGTGACTG       | ACAGGAAATGATGACCAGC         | 301                | 44    | 9   | 130420873    | 130421173   |
| G265_38 | TTGTCACTCTGTCCCCG         | CCCAGGAAGTGAAGTTGGG         | 269                | 45    | 9   | 130423178    | 130423446   |
| G265_39 | TTAGAGCCTTCCAGGGAGG       | AACCAATGACACGGAAGGAG        | 312                | 46    | 9   | 130426347    | 130426658   |
| G265_40 | GTTAGGAAGATTGGGATTTATCTG  | AGTGAAGACGCCACCAGTC         | 270                | 47    | 9   | 130427084    | 130427353   |
| G265_41 | TGCCATCTGAGCCTAGGAAG      | CAGAGCTGGGCAGACAGAAG        | 362                | 48    | 9   | 130427794    | 130428155   |
| G265_42 | CACCCACCTCTGCAC           | GTGACTCAGTTAAGTGTGGGC       | 456                | 49    | 9   | 130428418    | 130428873   |
| G265_43 | TGAGCCATCTGTGAAGGAG       | CACAAAGCACCACCACCTC         | 283                | 50    | 9   | 130429411    | 130429693   |
| G265_44 | TGTGTCTTCTCTGTCCCC        | GGATCCTCCACAAGCCAG          | 186                | 51    | 9   | 130429942    | 130430127   |
| G265_45 | TGAGAGAAGGTTTCTGAGC       | AGGGAAGGGGTACCCTGG          | 198                | 52    | 9   | 130432348    | 130432545   |
| G265_46 | CAGAGGGCAGTAAGTGCTC       | TGTCTGCAGCACAAGCC           | 528                | 53-54 | 9   | 130434147    | 130434674   |
| G265_47 | GAGTTCAGCCTTACTCGCCC      | CCTGTTACCCAGACTCAGC         | 554                | 55-56 | 9   | 130434587    | 130435140   |
| G265_48 | AGCATCTGAGACCTGGGAG       | ACAGAGGAGCGGACATGC          | 274                | 57    | 9   | 130435230    | 130435503   |

**Table S3.** Variants identified in *SPTANI* from screening 95 ID patients

| c.DNA change          | Amino acid change | dbSNP131 rs# | Occurrence/n=95 | Inheritance         | SIFT        | PolyPhen    |
|-----------------------|-------------------|--------------|-----------------|---------------------|-------------|-------------|
| c.1679A>G             | p.E560G           | NA           | 1               | Mother <sup>1</sup> | 0.20        | 0.84        |
| <b>c.1697G&gt;C</b>   | <b>p.R566P</b>    | <b>NA</b>    | <b>1</b>        | <b>de novo</b>      | <b>0.02</b> | <b>2.36</b> |
| c.2070T>C             | p.I690I           | NA           | 1               | Mother <sup>1</sup> | NA          | NA          |
| c.5908G>A             | p.A781A           | 34084388     | 2               | ND                  | NA          | NA          |
| c.2610A>G             | p.Q870Q           | NA           | 1               | Mother <sup>1</sup> | NA          | NA          |
| c.3300G>A             | p.A1100A          | 2227865      | 2               | ND                  | NA          | NA          |
| c.3456T>C             | p.D1182D          | 945831       | 2               | ND                  | NA          | NA          |
| c.4410C>T             | p.T1470T          | 2228951      | 1               | ND                  | NA          | NA          |
| c.5437C>A             | p.R1813R          | 3750333      | 4               | ND                  | NA          | NA          |
| c.5523C>T             | p.I1841I          | 79569204     | 1               | ND                  | NA          | NA          |
| c.5925G>A             | p.A1975A          | 11543345     | 1               | ND                  | NA          | NA          |
| c.6549C>A             | p.T2178T          | NA           | 1               | Father <sup>1</sup> | NA          | NA          |
| <b>c.6605_6607del</b> | <b>p.Q2202del</b> | <b>NA</b>    | <b>1</b>        | <b>de novo</b>      | NA          | NA          |
| c.7389C>T             | p.T2463T          | 2228952      | 1               | ND                  | NA          | NA          |

<sup>1</sup>Unaffected (healthy) parent. cDNA and amino acid positions are based on *SPTANI* reference sequence NM\_001130438.2. NA, not available. ND, not determined. Missense predicted protein damaging if SIFT (<http://sift.jcvi.org>) < 0.05 and/or PolyPhen (<http://genetics.bwh.harvard.edu/pph/>) > 1.8.

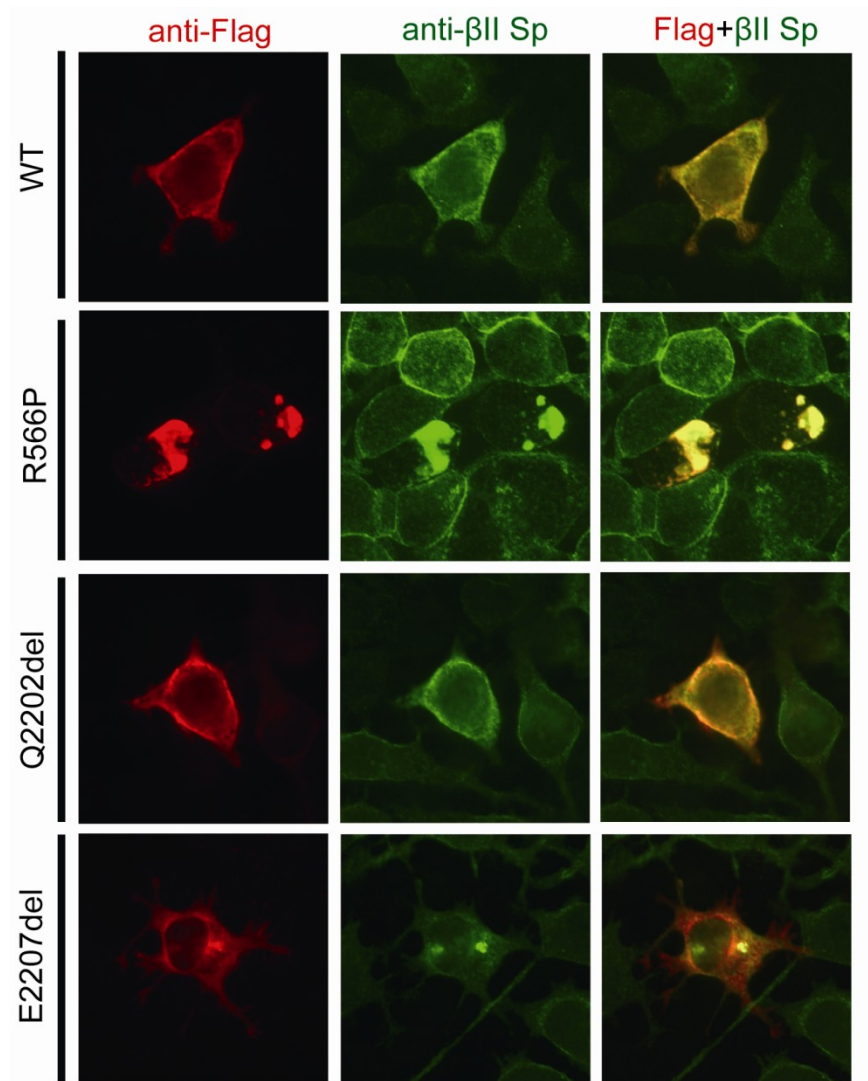

**Figure S1.** Double immunostaining in N2A cells showing overlapping expression between SPTAN1 mutant constructs and endogenous  $\beta$ -II spectrin subunit.  $\beta$ -III spectrin was not detected (not shown).
